# Supplementary material for: Resting-state MEG measurement of functional activation as a biomarker for cognitive decline in MS
Source: PubMed Central journal article supplement — Mult Scler. 2018 Nov 22;25(14):1896–906. doi: 10.1177/1352458518810260 (PMC6875827; doi:10.1177/1352458518810260), 2018-11-22
Supplement: Supplementary_Figure_4.pdf [file Supplementary_Figure_4.pdf]

**Supplementary Information – Correlation between alpha1 and theta power and average cognition excluding healthy controls**

**r-Figure 4 | Correlation between global relative alpha1 and theta power (averaged over 78 cortical ROIs) and average cognition Z-scores, in MS patients only**

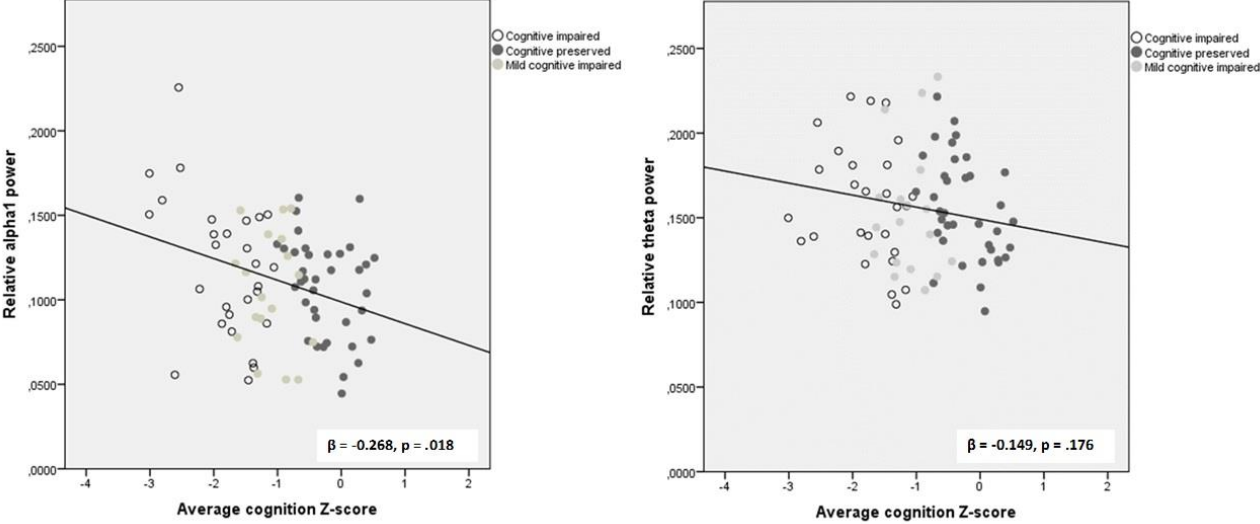

**r-Figure 4 |  $\beta$  = standardized coefficient, corrected for age, gender and education.**
