# Supplementary material for: Resting-state MEG measurement of functional activation as a biomarker for cognitive decline in MS
Source: PubMed Central journal article supplement — Mult Scler. 2018 Nov 22;25(14):1896–906. doi: 10.1177/1352458518810260 (PMC6875827; doi:10.1177/1352458518810260), 2018-11-22
Supplement: Supplementary_Information_SDMT_FDR.pdf [file Supplementary_Information_SDMT_FDR.pdf]

## Supplementary Information – Correlation results information processing speed

**Table 6 | Correlation between information processing speed and whole brain relative spectral powers and peak frequency (before and after FDR-correction)**

| Cognitive subdomain                 | Relative power measure | $\beta$ | p-value | FDR          |
|-------------------------------------|------------------------|---------|---------|--------------|
| <i>Information processing speed</i> | Peak                   | 0.013   | 0.889   | <b>0.987</b> |
|                                     | Delta (0.5-4Hz)        | 0.055   | 0.555   | <b>0.634</b> |
|                                     | Theta (4-8 Hz)         | -0.133  | 0.154   | <b>0.246</b> |
|                                     | Alpha 1 (8-10Hz)       | -0.143  | 0.134   | <b>0.179</b> |
|                                     | Alpha 2 (10-13Hz)      | 0.163   | 0.090   | <b>0.72</b>  |
|                                     | Beta (13-30Hz)         | 0.036   | 0.692   | <b>0.790</b> |
|                                     | Gamma (30-48Hz)        | 0.089   | 0.344   | <b>0.459</b> |

**Table 6** | Standardized coefficients, corrected for age, gender and education. In bold the resultant p-values after FDR-correction, correcting for six frequency bands plus peak-frequency times eight cognitive domains.

**Figure 5 | Correlation between global relative alpha1 and theta power (averaged over 78 cortical ROIs) and information processing speed**

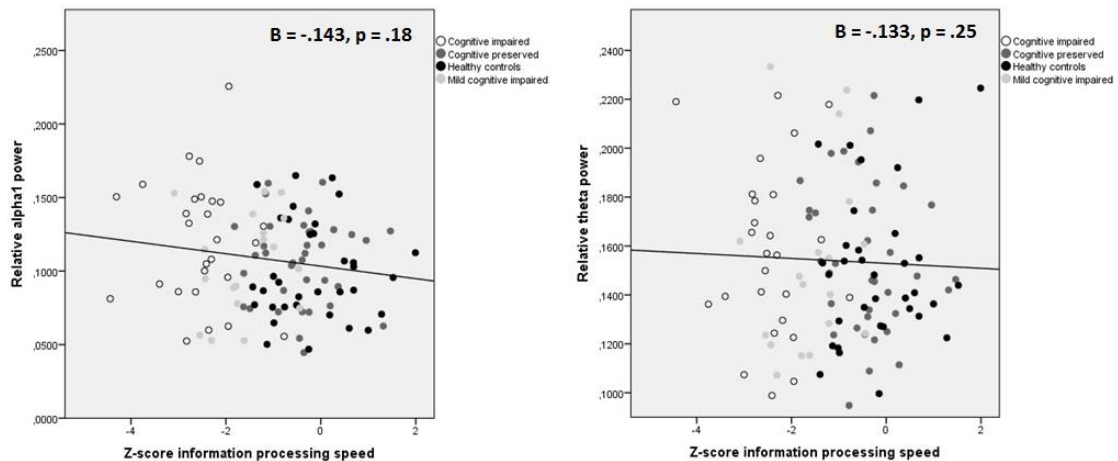

**Figure 5** |  $\beta$  = standardized coefficient, corrected for age, gender and education. P-value is corrected for multiple comparisons, correcting for six frequency bands plus peak-frequency times eight cognitive domains.
